**Ono et al., SUPPLEMENTAL FIGURE LEGENDS**

**Supplemental Figure S1.** Preferential expression of CD49f and CD34 in myoSP.

Isolated myoSP and myoMP were stained with antibodies against CD49f and CD34 and subjected to flow cytometric analysis.

**Supplemental Figure S2.** Multipotential differentiation of human mesenchymal stem cells (hMSCs)

(A, B) Osteoblast-differentiation capacity of hMSCs, as determined by alkaline phosphatase staining (A) and by RT-PCR for the expression of osteoblast lineage-specific genes as indicated (B). The confluent hMSCs were treated with osteogenic differentiation-inducing media [induction (+)] or with MSCGM alone [induction (-)]. *PTH1R*, parathyroid hormone 1 receptor; *ALPL*, alkaline phosphatase, liver/bone/kidney. Bar, 50  $\mu$ m. (C, D) Adipocyte-differentiation capacity of hMSCs, as determined by Oil red-O staining (C) and by RT-PCR for the expression of adipocyte lineage-specific genes as indicated (D). The confluent hMSCs were treated with adipocyte differentiation-inducing media [induction (+)] or with MSCGM alone [induction (-)]. *LPL*, lipoprotein lipase; *PPARG*, peroxisome proliferator-activated receptor gamma. Bar = 50  $\mu$ m. (E, F) Chondrocyte-differentiation capacity of hMSCs, as determined by staining with toluidine blue (E, left panel) or collagen type II (E, right panel) and by RT-PCR for the expression of chondrocyte lineage-specific genes as indicated (F). The hMSCs cultured at dishes (before induction) were transferred into a 15 mL centrifuge tube and fed with chondrogenic induction medium for 4 weeks (after induction). *ACAN*, aggrecan. Bar = 100  $\mu$ m.

Supplemental Figure S1. Ono, et al.

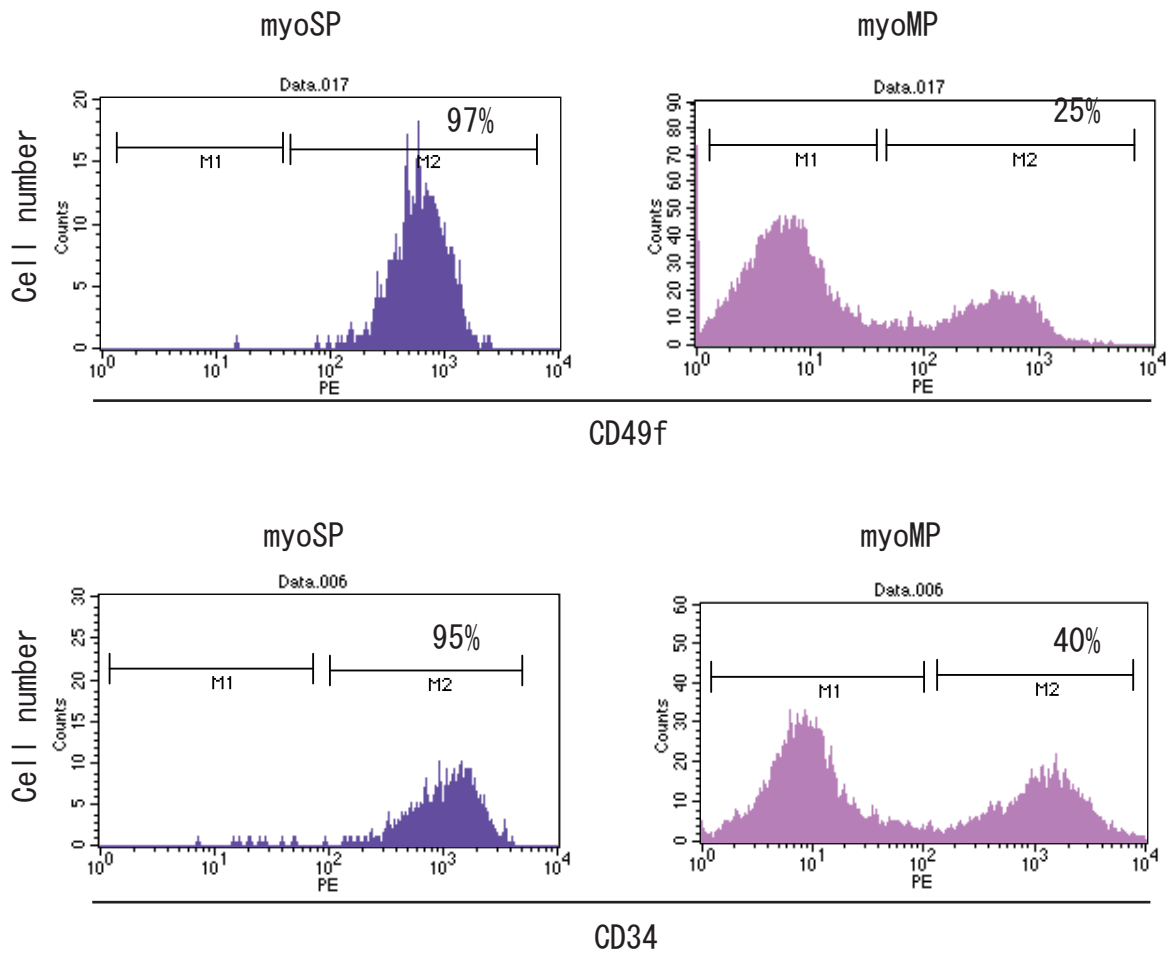

Supplemental Figure S2. Ono, et al.

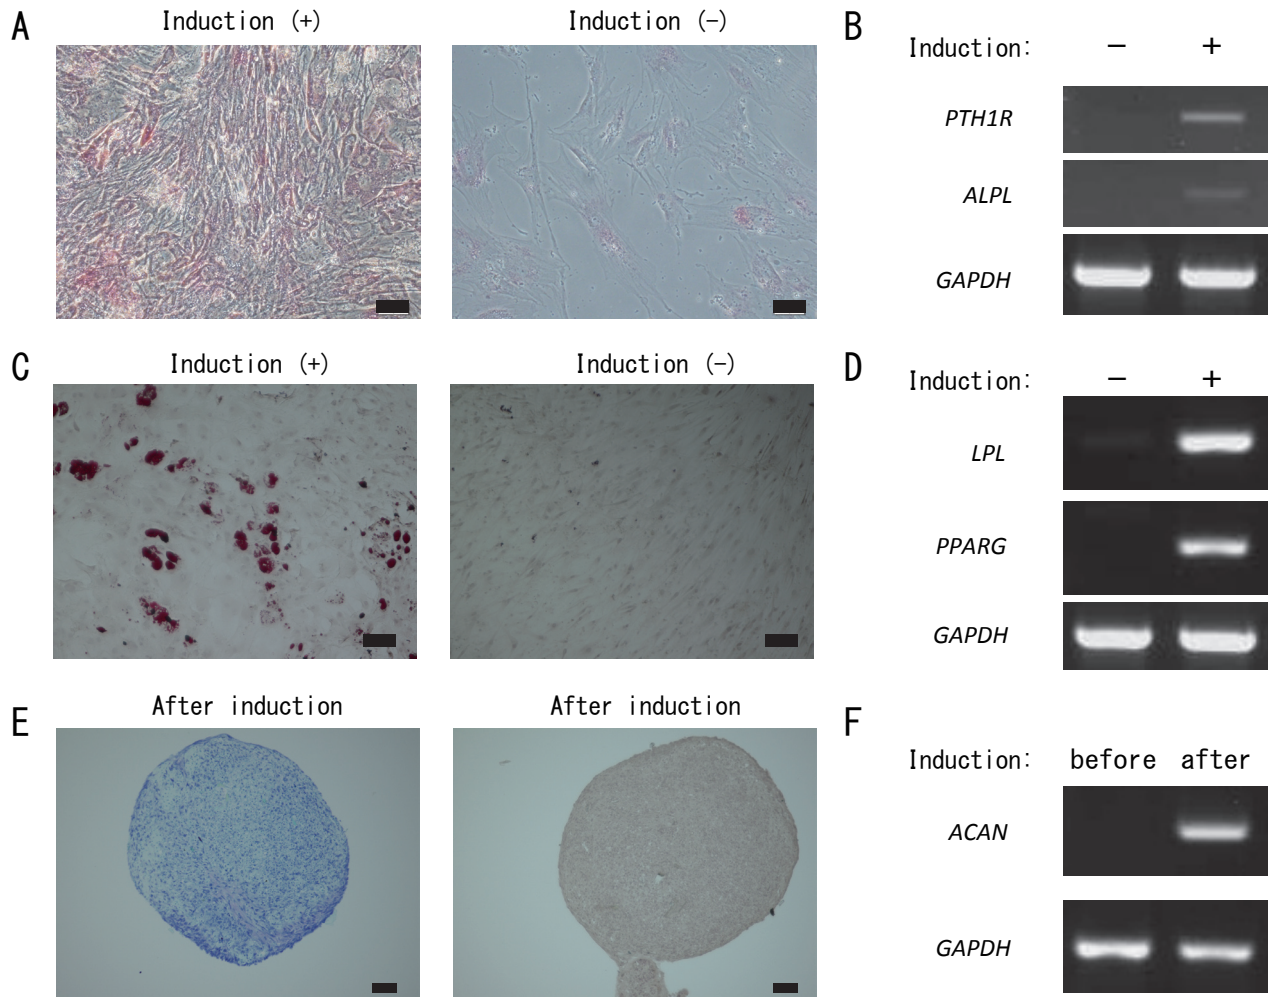

Source: https://academic.oup.com/biolreprod/article-pdf/93/2/37,%201-9/10554285/biolreprod0037.pdf
